# Supplementary material for: Micronutrients and Breast Cancer Progression: A Systematic Review
Source: PubMed Central journal article supplement (PMC7759972; doi:10.3390/nu12123613), 2020-11-25
Supplement: nutrients-12-03613-s001.pdf [file nutrients-12-03613-s001.pdf]

## SUPPLEMENTARY MATERIAL

Table S1. Vitamin D, Cell culture

| AUTHOR &<br>YEAR of PUBLICATION | MICRONUTRIENT<br>STUDIED             | MODEL                                                               | DOSIS & TIME                                                                                                             | REFERENCE |
|---------------------------------|--------------------------------------|---------------------------------------------------------------------|--------------------------------------------------------------------------------------------------------------------------|-----------|
| WILMANSKI<br>2017               | Vit D                                | MCF10A-ras & MCF10A-ErbB2                                           | [1,25(OH) <sub>2</sub> D] < 0.1 % in fresh medium changed every 24h                                                      | 26        |
| PLUCHINO<br>2015                | Ergosterol                           | MCF10A & CF12A                                                      | 10nM 24h                                                                                                                 | 30        |
| WAHLER<br>2015                  | Vit D                                | MCF10DCIS (basal-like BC)                                           | 1 $\alpha$ 25(OH) <sub>2</sub> D <sub>3</sub> : 100nM 24h                                                                | 19        |
| ZHENG<br>2013                   | Vit D (1,25(OH) <sub>2</sub> D)      | MCF10A & MCF10A-ras                                                 | 1,25(OH) <sub>2</sub> D 10nM for 4 days                                                                                  | 29        |
| ZHOU<br>2016                    | Vit D                                | Harvey-ras oncogene transformed MCF10A                              | 1,25(OH) <sub>2</sub> D 10nM in medium changed every 24h for 3 days                                                      | 27        |
| SHAN<br>2017                    | Vit D                                | Mammospheres of TNBC with CSC properties                            | 10nM and/or 100nM<br>5 days                                                                                              | 18        |
| GARCÍA-BECERRA<br>2010          | Vit D (Calcitriol)                   | Cell culture deviated from breast tumors needle biopsy & MDA-MB-231 | 24h incubation: 10 <sup>-7</sup> , 10 <sup>-8</sup> , 10 <sup>-9</sup> & 10 <sup>-10</sup> M.                            | 31        |
| PADUCH<br>2005                  | Vit D                                | T47D in 2D & 3D models                                              | 10, 50 & 100nM/L<br>24 & 48 h                                                                                            | 28        |
| TAVERA-MENDOZA<br>2017          | Vit D                                | MCF-7, ZR75, MDA-MB-231 & MCF10A                                    | 100nM, 4h                                                                                                                | 32        |
| KRISHNAN<br>2010                | Vit D (Calcitriol)                   | MCF-7, T47D, XR-75-1 & MDA-MB-231                                   | 24h: 10nM in all but MDA-MB-231: 100nM                                                                                   | 17        |
| OOI<br>2010                     | Vit D                                | MCF-7                                                               | 1,25(OH) <sub>2</sub> D <sub>3</sub> : 10 <sup>-7</sup> , 10 <sup>-8</sup> o 10 <sup>-9</sup> M<br>once a day for 6 days | 24        |
| KOREN<br>2001                   | Vit D (1,25(OH) <sub>2</sub> D)      | MCF-7                                                               | 10-100 nM 24-48h                                                                                                         | 22        |
| YUAN<br>2012                    | Vit D                                | MCF-7                                                               | 100 nM/1 72h                                                                                                             | 20        |
| SWAMI<br>2000                   | 1,25(OH) <sub>2</sub> D <sub>3</sub> | MCF-7                                                               | 1, 10 o 100nM, 2 days                                                                                                    | 25        |

| <b>AUTHOR &amp;<br/>YEAR of PUBLICATION</b> | <b>MICRONUTRIENT<br/>STUDIED</b>     | <b>MODEL</b>                               | <b>DOSIS &amp; TIME</b>    | <b>REFERENCE</b> |
|---------------------------------------------|--------------------------------------|--------------------------------------------|----------------------------|------------------|
| <b>NOLAN<br/>1998</b>                       | 1,25(OH) <sub>2</sub> D <sub>3</sub> | MCF-7 variants resistant to ER antagonists | 100nM, 96h                 | 23               |
| <b>JAMES<br/>1996</b>                       | 1,25(OH) <sub>2</sub> D <sub>3</sub> | MCF-7 & MNU rats                           | 10 <sup>-8</sup> M, 6 days | 21               |

Table S2. Vitamin D, pre-clinical studies

| <b>AUTHOR &amp;<br/>YEAR of PUBLICATION</b> | <b>MICRONUTRIENT<br/>STUDIED</b>     | <b>MODEL</b>                                                               | <b>DOSIS &amp; TIME</b>                                                                        | <b>REFERENCES</b> |
|---------------------------------------------|--------------------------------------|----------------------------------------------------------------------------|------------------------------------------------------------------------------------------------|-------------------|
| <b>ANISIEWICZ<br/>2018</b>                  | CALCITRIOL and low-calcemic analogs  | 4T1 Mice                                                                   | 0.5 ug/kg (3/w from day 7 to day 33)                                                           | 33                |
| <b>CHEN<br/>2018</b>                        | Vit D                                | 1 $\alpha$ (OH)ase <sup>-/-</sup> Mice                                     | 3/w subcutaneous injections with 1.25(OH) <sub>2</sub> D <sub>3</sub> . 1 $\mu$ g/kg per mouse | 38                |
| <b>LI<br/>2016</b>                          | Vit D                                | PyMT-MMTV Mice                                                             | 1,25(OH) <sub>2</sub> D : 0,1nM & 100nM or 25(OH)D: 1nM & 100nM                                | 40                |
| <b>SWAMI<br/>2016</b>                       | Vit D                                | C57BL/6 mice with cells from Mmtv-wnt1 mice injected                       | 6 weeks                                                                                        | 25                |
| <b>WILLIAMS<br/>2016</b>                    | Vit D                                | Balb/c mice with cells from Mmtv-wnt1 injected                             | 2 Diets (w/wo Vit D). 10 weeks                                                                 | 36                |
| <b>GARCÍA-QUIROZ<br/>2014</b>               | Calcitriol                           | Nu/Nu mice with T-47D cell xenotransplant and from primary BC cell culture | Calcitriol intraperitoneal injections 0.03ul/g/body weight. 3 weeks.                           | 39                |
| <b>ROSSDEUTSCHER<br/>2014</b>               | Vit D                                | MMTV-PyMT mice                                                             | low diet (25 IU/kg) or normal (1000 IU/Kg) Vit D. From week 3 until sacrifice                  | 35                |
| <b>NOLAN<br/>1998</b>                       | 1,25(OH) <sub>2</sub> D <sub>3</sub> | Variants of MCF-7 resistant to ER antagonist & nu/nu mice                  | 100nM 1,25(OH) <sub>2</sub> D <sub>3</sub> for 96h                                             | 23                |
| <b>JAMES</b>                                | 1,25(OH) <sub>2</sub> D <sub>3</sub> | MCF-7 & MNU rats                                                           | 10 <sup>-8</sup> M. 6 days                                                                     | 21                |

| AUTHOR & YEAR of PUBLICATION | MICRONUTRIENT STUDIED | MODEL | DOSIS & TIME | REFERENCES |
|------------------------------|-----------------------|-------|--------------|------------|
| 1996                         |                       |       |              |            |

Table S3. Vitamin D, clinical studies

| AUTHOR & YEAR of PUBLICATION    | MICRONUTRIENT STUDIED                | MODEL                                                                                                                                             | DOSIS & TIME                                  | REFERENCES |
|---------------------------------|--------------------------------------|---------------------------------------------------------------------------------------------------------------------------------------------------|-----------------------------------------------|------------|
| <b>MADDEN<br/>2018</b>          | Vit D                                | Supplementation after diagnosis (January 2001-December 2011). Ireland cancer data bases were analyzed & associated to Vit D medical prescriptions | 10µg/day since death or since December 2011   | 9          |
| <b>PEPPONE<br/>2012</b>         | Vit D                                | Peripheral blood test from 224 women with BC                                                                                                      | 1000 IU/day or 50000 IU/w. 8-16 w             | 37         |
| <b>AMIR<br/>2010</b>            | Vit D <sub>3</sub>                   | 38 women with BC & bone metastasis                                                                                                                | 10000UI/day & 1000mg calcium. 4 months        | 34         |
| <b>SHIN<br/>2018</b>            | Vit D                                | Korean women diagnosed with BC and with resection surgery                                                                                         | Measure of blood [25(OH)D]                    | 41         |
| <b>YAO<br/>2017</b>             | Vit D                                | 25OHD measure in serum in 1666 women with BC                                                                                                      | Women followed for 12, 24, 48, 72 & 96 months | 42         |
| <b>THANASITTHICHAJ<br/>2015</b> | Vit D                                | Serum levels in 200 women with BC                                                                                                                 | Serum levels by HPLC                          | 43         |
| <b>PALMIERI<br/>2006</b>        | Vit D (25(OH)D)                      | 279 Caucasian women with BC                                                                                                                       | Serum levels                                  | 44         |
| <b>MAWER<br/>1996</b>           | 1,25(OH) <sub>2</sub> D <sub>3</sub> | 129 women with BC                                                                                                                                 | Serum levels                                  | 45         |

Table S4. Metals

| AUTHOR &<br>YEAR of PUBLICATION | MICRONUTRIENT<br>STUDIED | MODEL                                | DOSIS & TIME                                                                                         | REFERENCE |
|---------------------------------|--------------------------|--------------------------------------|------------------------------------------------------------------------------------------------------|-----------|
| CHAN<br>2016                    | Cu                       | 75 women with BC                     | Patients took a Cu chelate to maintain ceruloplasmin levels 8-17mg/dl for two years or until relapse | 60        |
| CIHAN<br>2011                   | Several metals           | 52 women with BC Stage III           | Trace elements in hair measured                                                                      | 57        |
| OSTRAKHOVITCH<br>2004           | Cu & Zn                  | MCF-7 & MDA-MB-231                   | 10 & 25µM CuSO <sub>4</sub> or 10 & 25µM ZnSO <sub>4</sub> for 4 days                                | 56        |
| JABLONSKA<br>2017               | Se & Fe                  | Tumoral tissue from 42 women with BC | -                                                                                                    | 70        |
| CHIFMAN<br>2017                 | Fe                       | Predictive mathematical model        | -                                                                                                    | 67        |
| GARCÍA<br>2016                  | Fe                       | MCF-7 & MDA-MB-231                   | Fe concentration in cell cultures                                                                    | 69        |
| COOMBS<br>2015                  | Fe                       | 4T1 mice & MDA-MB-468                | Fe chelates in different concentrations for 72h                                                      | 68        |
| CIHAN<br>2011                   | Several metals           | 52 women with BC Stage III           | Trace elements in hair                                                                               | 57        |
| JABLONSKA<br>2017               | Se & Fe                  | Tumoral tissue from 42 women         | -                                                                                                    | 70        |
| WARRINGTON<br>2013              | Se                       | BALB/c mice & MCF-7                  | 0.16/ 0.51/ 0.85 & 1.15 ppm in milk casein.<br>10 weeks                                              | 79        |
| GUO<br>2013                     | Se                       | BALB/cByJNarl mice                   | Se measured in serum 22 days after the injection with tumor cells                                    | 78        |
| HARRIS<br>2012                  | Se                       | 3146 Swedish women with invasive BC  | Nutritional questionnaire with mean 10.6 years before BC diagnosis                                   | 77        |
| CIHAN<br>2011                   | Several metals           | 52 women with BC Stage III           | Trace elements in hair                                                                               | 57        |

|                          |         |                                                                                          |                                                                       |    |
|--------------------------|---------|------------------------------------------------------------------------------------------|-----------------------------------------------------------------------|----|
| <b>MATSUI<br/>2017</b>   | Zinc    | MCF-7                                                                                    | Cells supplemented with G<br>& measure intracellular Zn <sup>2+</sup> | 89 |
| <b>COSTELLO<br/>2016</b> | Zinc    | Human tissue                                                                             | -                                                                     | 85 |
| <b>CIHAN<br/>2011</b>    | Various | 52 women diagnosed with<br>BC Stage III                                                  | Trace elements in hair                                                | 57 |
| <b>KAGARA<br/>2007</b>   | Zinc    | Samples BC from 177<br>women with primary<br>breast tumors & several<br>BC cell cultures | Zn chelation                                                          | 87 |

Table S5. Folates

| <b>AUTHOR &amp;<br/>YEAR of PUBLICATION</b> | <b>MICRONUTRIENT<br/>STUDIED</b>         | <b>MODEL</b>                              | <b>DOSIS &amp; TIME</b>                                                              | <b>REFERENCE</b> |
|---------------------------------------------|------------------------------------------|-------------------------------------------|--------------------------------------------------------------------------------------|------------------|
| <b>HANSEN<br/>2017</b>                      | Folic Acid                               | MMTV-PyMT Transgenic<br>Mice              | 10mg/kg (high) or 2mg/Kg<br>(normal) for 40 days                                     | 98               |
| <b>MANSHADI<br/>2014</b>                    | Folic Acid                               | Sprague-Dawley Rats                       | 2 mg/kg (control), 5 mg/kg, 8<br>mg/kg or 10mg/kg FA<br>for 12 weeks                 | 102              |
| <b>LEE<br/>2012</b>                         | B <sub>2</sub> , B <sub>6</sub> & Folate | 980 women                                 | Nutrition questionnaire when<br>diagnosis                                            | 100              |
| <b>LUBECKA-<br/>PIETRUSZEWSKA<br/>2013</b>  | Folic Acid                               | MCF-7 & MDA-MB-231                        | Cell cultures with 1mg/l FA<br>For treatments add 4mg/l<br>(low) or 8mg/l (high)     | 101              |
| <b>HARRIS<br/>2012</b>                      | Folate                                   | 3116 women with BC                        | Nutrition questionnaire                                                              | 103              |
| <b>NAUSHAD<br/>2012</b>                     | Folate                                   | 286 women with BC                         | Blood test analysis                                                                  | 104              |
| <b>KOTSOPOULOS<br/>2005</b>                 | Folates                                  | Sprague-Dawley (tumors<br>induced by MNU) | 0, 2 (control) or 8 mg/kg FA in<br>diet during initiation and<br>promotion of tumors | 99               |

Table S6. Vitamin C

| AUTHOR &<br>YEAR of PUBLICATION | MICRONUTRIENT<br>STUDIED        | MODEL                                                                                                                                                   | DOSIS & TIME               | REFERENCE |
|---------------------------------|---------------------------------|---------------------------------------------------------------------------------------------------------------------------------------------------------|----------------------------|-----------|
| CHA<br>2016                     | Vit C                           | Balb/c mice without endorse synthesis of Vit C ( <i>Gulo</i> <sup>-/-</sup> ) & mice with production of human Lp(a)+<br>Inoculated with 4T1 tumor cells | Several treatments for 6 w | 112       |
| NAGAMMA<br>2014                 | Vit C &<br>$\alpha$ -tocopherol | 42 non-smoking women, 42 non-smoking women with BC & 42 smoking women with BC                                                                           | Serum levels               | 116       |
| HARRIS<br>2013                  | Vit C                           | 3405 women                                                                                                                                              | Nutritional questionnaire  | 114       |
| MIKIROVA<br>2012                | Vit C                           | 12 women with BC                                                                                                                                        | Intravenous dose: 7.5g-50g | 117       |
| KIM<br>2006                     | Ascorbic Acid                   | MCF-7 cells                                                                                                                                             | 1,2,5 or 10 mM for 3 days  | 113       |
| KHANZODE<br>2004                | Ascorbic Acid                   | 96 women with BC without treatment                                                                                                                      | Serum levels               | 115       |

Table S7. Polyphenols

| AUTHOR &<br>YEAR of PUBLICATION | MICRONUTRIENT<br>STUDIED | MODEL                    | DOSIS & TIME                                                                 | REFERENCE |
|---------------------------------|--------------------------|--------------------------|------------------------------------------------------------------------------|-----------|
| NASO<br>2016                    | Luteolin                 | MDA-MB-231 cell cultures | Migration test 4h (8.5 $\mu$ M)<br>Adhesion test 24h (8.5 $\mu$ M)           | 130       |
| BOUALLAGUI<br>2011              | Hydroxytyrosol           | MCF-7 cell cultures      | 2000, 2200, 2400, 2600, 2800 y 3000 $\mu$ g/ml on different incubation times | 129       |
| SCHINDLER<br>2006               | Flavonoids & Vit E       | MDA Cell cultures        | 0.1, 1 or 100 $\mu$ M/L 24h                                                  | 131       |
| MURATA<br>2004                  | Soy Isoflavones          | MCF-7 cell cultures      | 10 <sup>-10</sup> -10 <sup>-5</sup> M. 6 days                                | 128       |

Table S8. Fatty Acid

| <b>AUTHOR &amp;<br/>YEAR of PUBLICATION</b> | <b>MICRONUTRIENT<br/>STUDIED</b> | <b>MODEL</b>                    | <b>DOSIS &amp; TIME</b>                                           | <b>REFERENCE</b> |
|---------------------------------------------|----------------------------------|---------------------------------|-------------------------------------------------------------------|------------------|
| <b>FEUERECKER<br/>2012</b>                  | Lipoic Acid                      | SkBr3 cell culture & naked mice | SkBr3: 2,5/5/7.5 & 10mM<br>Naked mice: 18.5mg/kg/day<br>(28 days) | 142              |
| <b>DOZIO<br/>2010</b>                       | $\alpha$ -lipoic acid            | MCF-7 cell culture              | 0.25-2.5mM for 24,48 & 72h                                        | 141              |
| <b>ROSSI<br/>2008</b>                       | Lipoic Acid                      | Mice over-expressing HER2       | 80, 300 or 500 $\mu$ g/day for life                               | 144              |
| <b>MENENDEZ<br/>2006</b>                    | $\alpha$ -linolenic Acid         | BT-474 & SKBr-3 cell cultures   | 10 or 20 $\mu$ M                                                  | 143              |

Table S9. Vitamin E

| <b>AUTHOR &amp;<br/>YEAR of PUBLICATION</b> | <b>MICRONUTRIENT<br/>STUDIED</b> | <b>MODEL</b>                                                                  | <b>DOSIS &amp; TIME</b>                                                                                                              | <b>REFERENCE</b> |
|---------------------------------------------|----------------------------------|-------------------------------------------------------------------------------|--------------------------------------------------------------------------------------------------------------------------------------|------------------|
| <b>ALGAYADH<br/>2016</b>                    | Tocotrienol (Vit E)              | MDA-MB-231 & MCF-10A cell cultures                                            | 0-20 $\mu$ M/day in fresh medium for 4 days.<br>0-60 $\mu$ M for acute treatment for 24h.<br>0-6 $\mu$ M for 4 days for western blot | 152              |
| <b>NAGAMMA<br/>2014</b>                     | Vit C & $\alpha$ -tocopherol     | 42 non-smoking women, 42 non-smoking women with BC & 42 smoking women with BC | Serum levels                                                                                                                         | 154              |
| <b>ELANGO VAN<br/>2008</b>                  | $\delta$ -tocotrienol            | MDA-MB-231                                                                    | 1-20 $\mu$ M in 24, 48 & 72h                                                                                                         | 153              |
| <b>SCHINDLER<br/>2006</b>                   | Flavonoids & Vit E               | MDA Cell culture                                                              | 0.1, 1 or 100 $\mu$ M/L 24h                                                                                                          | 131              |

Table S10. Iodine

| <b>AUTHOR &amp;<br/>YEAR of<br/>PUBLICATION</b> | <b>MICRONUTRIENT<br/>STUDIED</b> | <b>MODEL</b>                                | <b>DOSIS &amp; TIME</b>                                       | <b>REFERENCE</b> |
|-------------------------------------------------|----------------------------------|---------------------------------------------|---------------------------------------------------------------|------------------|
| <b>ALFARO<br/>(2003)</b>                        | Iodine                           | Sprague-Dawley rats tumor<br>induced by MNU | 0.05% I <sub>2</sub> in drinking water                        | 171              |
| <b>MENDEIETA<br/>(2019)</b>                     | Iodine                           | MCF-7 & MDA-MB-231                          | 200 µM I <sub>2</sub>                                         | 176              |
| <b>STODDARD<br/>(2008)</b>                      | Iodine/Iodide                    | MCF-7                                       | Lugol (5%I <sub>2</sub> & 10%KI)<br>1 & 5mM iodine/iodide 48h | 174              |
